# Supplementary material for: BRAFV600E mutation impinges on gut microbial markers defining novel biomarkers for serrated colorectal cancer effective therapies
Source: J Exp Clin Cancer Res. 2020 Dec 14;39:285. doi: 10.1186/s13046-020-01801-w (PMC7737386; doi:10.1186/s13046-020-01801-w)
Supplement: Supplementary file 2 — Additional file 2: Supplementary Table S1. Relative bacterial abundance at the phylum, genus and species level in fecal microbiota of mice at 7 DPT. [file 13046_2020_1801_MOESM2_ESM.xlsx]

## Sheet: 7DPT
Supplementary Table S1. Relative bacterial abundance at the phylum, genus and species level in fecal microbiota of mice at 7 DPT.
	Name	CCSCs BRAF wt#1		CCSCs BRAF wt#2		CCSCs BRAFV600E		Healthy		CCSCs BRAF wt#1 vs Healthy		CCSCs BRAF wt#2 vs Healthy		CCSCs BRAFV600Evs Healthy
		Mean	SD	Mean	SD	Mean	SD	Mean	SD	p-Value	FDR	p-Value	FDR	p-Value	FDR
PHYLUM	Actinobacteria	0	0	0	0	0.00143576	0.000222534	0.00187964	0.000268065	0.0318971	0.0637942	0.0183235	0.0213774	0.213364	0.213364
	Bacteroidetes	0.306822	0.0258782	0.607712	2.86608e-05	0.47509	0.025771	0.381106	0.00619846	0.0585808	0.0781077	0.01231	0.0184952	0.0375441	0.0438015
	Candidatus Saccharibacteria	0.00268937	5.56452e-05	0	0	0	0	0	0	0.00931345	0.0372538	N/A	N/A	N/A	N/A
	Chloroflexi	0	0	0.00155899	9.04637e-05	0.00104186	9.31633e-05	0.00308643	0.000489465	0.107789	0.107789	0.0492105	0.0492105	0.0284333	0.0398066
	Firmicutes	0.627894	0.0182128	0.335186	0.00409517	0.433503	0.0195572	0.538975	0.0140551	0.0318771	0.0637942	0.00257034	0.0107519	0.0250931	0.0398066
	Proteobacteria	0.00758375	0.0043101	0.00889873	0.000132928	0.00998218	0.00109203	0.0211728	0.00139839	0.05135	0.0781077	0.00648502	0.0151317	0.0123368	0.0398066
	Tenericutes	0.00115919	0.00051171	0.0010969	1.21458e-05	0.00139931	3.4907e-05	0.0023668	0.000208136	0.0906305	0.103578	0.0132109	0.0184952	0.0229746	0.0398066
	Verrucomicrobia	0	0	0.00517334	7.57773e-05	0.0293229	0.000955537	0.00273507	0.000175937	0.0031306	0.0250448	0.00307198	0.0107519	0.000667027	0.00466919
GENUS	Akkermansia	0	0	0.00508849	9.99183e-05	0.0289285	0.000922601	0.00265447	0.000171348	0.00281753	0.0165921	0.00330401	0.00859043	0.000637175	0.00662661
	Alistipes	0	0	0.0114054	0.00133838	0.0187261	0.00057798	0	0	N/A	N/A	0.0530109	0.0725412	0.0139095	0.0293031
	Anaerostipes	0.0971782	0.00857431	0.0767855	0.000192919	0.0629652	0.000729517	0.0936793	0.0121496	0.770963	0.888283	0.299432	0.305303	0.070336	0.0870827
	Anaerotignum	0.00284259	0.000104658	0.00302297	1.73458e-05	0.0035873	1.87674e-05	0.00276891	0.000128077	0.593085	0.731012	0.108707	0.122886	0.012279	0.0279027
	Asticcacaulis	0.00172641	4.21716e-05	0	0	0.00111996	0.000300813	0.0022409	0.000167389	0.0519382	0.125124	0.00641857	0.0140878	0.0440638	0.0602978
	Bacteroides	0.00115285	0.000321082	0.32861	0.00173464	0.236045	0.0178353	0.00497646	0.000578755	0.0146528	0.0485375	1.59629e-05	0.00083007	0.0345318	0.0485312
	Barnesiella	0	0	0	0	0	0	0.0017529	0.000201163	0.0068831	0.0317602	0.0207845	0.0332393	0.023881	0.0400585
	Blautia	0.00973875	0.0115551	0	0	0	0	0.0014994	0.000219755	0.497297	0.6856	0.0210942	0.0332393	0.0260661	0.0423574
	Butyrivibrio	0.0121708	0.000491618	0.0144441	0.000790292	0.0141723	0.000155405	0.00283124	1.62363e-05	0.0235379	0.0634954	0.0305441	0.0441193	9.48949e-05	0.00393816
	Caldilinea	0	0	0	0	0	0	0.00136484	0.000257696	0.37512	0.598477	0.0792305	0.0915552	0.14454	0.163393
	Candidatus Sulcia	0	0	0.00191693	0.00013866	0.00219779	0.000211563	0.0112663	0.000180273	0.000132947	0.00302539	0.000295741	0.0025254	0.000469388	0.00610204
	Cellulosilyticum	0.0022069	0.000393411	0	0	0	0	0.00657067	0.000349399	0.007191	0.0317602	0.00150843	0.00522922	0.00159418	0.00921083
	Citrobacter	0	0	0	0	0	0	0.00313137	0.000166101	0.0238358	0.0634954	0.00520802	0.0123099	0.0238671	0.0400585
	Clostridium	0.0315383	0.0165366	0.00716065	0.000284903	0.00756687	0.00045621	0.0313241	0.00119513	0.987078	0.990916	0.00129016	0.00479203	0.00144657	0.00921083
	Dehalococcoides	0	0	0	0	0	0	0.00155913	0.000201714	0.00889188	0.0352581	0.0245534	0.0364794	0.014088	0.0293031
	Desulfallas	0	0	0.00297089	3.24066e-05	0.00322018	0.000325458	0.00496364	0.000319293	0.0303748	0.0766602	0.0127217	0.0228113	0.0325336	0.0485312
	Enterococcus	0	0	0.00138082	1.23846e-05	0	0	0	0	N/A	N/A	0.014119	0.0244729	N/A	N/A
	Ethanoligenens	0.00654567	0.00156199	0.00320783	0.000389661	0.00270242	5.04035e-05	0.00664848	6.01856e-05	0.940921	0.989914	0.00650208	0.0140878	0.000197831	0.00393816
	Eubacterium	0.01311	0.00265963	0.00724797	0.000193403	0.0111647	3.50084e-05	0.0143523	0.000278111	0.578704	0.73027	0.00113487	0.00453948	0.00384427	0.0179818
	Faecalibacterium	0.00582814	0.00107948	0.00213603	0.000283416	0.00345552	0.000415606	0.00707492	0.000263875	0.253487	0.447827	0.00305966	0.00837381	0.00912386	0.0279027
	Faecalitalea	0	0	0.005037	6.15977e-05	0.00883147	0.00086581	0	0	N/A	N/A	0.000201194	0.0025254	0.00568887	0.0211301
	Fastidiosipila	0.00112496	0.000526499	0	0	0	0	0	0	0.383929	0.598477	N/A	N/A	N/A	N/A
	Flammeovirga	0	0	0.00100038	0.000248439	0	0	0.0017751	0.000388564	0.0239605	0.0634954	0.140735	0.152463	0.0327391	0.0485312
	Flavonifractor	0.014368	0.0030224	0.00513519	7.79685e-05	0.00473972	0.000451009	0.00783304	0.000192928	0.0926967	0.196517	0.00296138	0.00837381	0.0123416	0.0279027
	Flintibacter	0.00242828	0.00268013	0	0	0	0	0	0	0.504498	0.6856	N/A	N/A	N/A	N/A
	Heliorestis	0.00117853	0.00133405	0	0	0	0	0	0	0.654843	0.788788	N/A	N/A	N/A	N/A
	Herbinix	0.0442712	0.00907676	0.0298385	0.00229243	0.0327802	0.00135425	0.0221182	0.00219477	0.0785243	0.180947	0.0750996	0.0912711	0.0280293	0.0441674
	Intestinibaculum	0	0	0	0	0	0	0.00117671	4.12667e-06	0.000191377	0.00302539	0.000950439	0.00453948	0.163154	0.17675
	Lachnoclostridium	0.0545753	0.0496832	0.00914962	0.00113084	0.00872202	0.0014094	0.014609	0.00154376	0.45894	0.675661	0.0562944	0.0750592	0.0576438	0.0758091
	Lactobacillus	0.00138138	0.000374887	0.00241294	3.59489e-05	0.00171584	2.28897e-05	0	0	0.169703	0.33312	0.00352091	0.00871844	0.0102621	0.0279027
	Muribaculum	0.132828	0.0408666	0.0947118	0.00181858	0.0737598	0.00550532	0.0704859	0.000448363	0.276287	0.472362	0.0029755	0.00837381	0.49011	0.509714
	Odoribacter	0	0	0.0340928	0.000946519	0.0256989	0.00360582	0.112608	0.000653769	2.41106e-05	0.00127786	0.000107312	0.0025254	0.000887792	0.0076942
	Oscillibacter	0.0579917	0.0172373	0.0152561	0.00258172	0.0132561	0.00167842	0.0330874	0.000861893	0.178077	0.337075	0.0114499	0.0220517	0.00449545	0.0179818
	Parabacteroides	0.0130991	0.0138516	0.00997696	0.000593076	0.00969796	0.00222585	0.0144881	0.00171759	0.900975	0.989914	0.0724217	0.0912711	0.137574	0.158975
	Petrocella	0.00119434	0.001556	0	0	0	0	0	0	0.490261	0.6856	N/A	N/A	N/A	N/A
	Roseburia	0.0308301	0.0107137	0.0060468	0.000296723	0.00519298	0.000792652	0.0274412	0.00317277	0.709763	0.835944	0.0109112	0.0218225	0.0106312	0.0279027
	Ruminococcus	0.0127859	0.00235939	0.00277266	0.000195584	0.00414375	0.000494661	0.0110214	0.000121033	0.401592	0.608126	0.000388523	0.0025254	0.00273011	0.0141966
	Salimicrobium	0	0	0	0	0.00101437	0.000132044	0.00231748	0.000104995	0.0010323	0.007816	0.00282325	0.00837381	0.00827593	0.0279027
	Stenotrophomonas	0.00134106	0.000875419	0.0022531	6.96179e-06	0.00104683	0.000119625	0.00296745	0.000233831	0.126427	0.257717	0.144529	0.153378	0.00922172	0.0279027
	Tannerella	0	0	0	0	0	0	0.00323361	0.000117232	0.00085734	0.00757317	0.0010099	0.00453948	0.0225334	0.0400585
	Turicibacter	0	0	0	0	0.00166108	1.6297e-05	0.00218162	4.61103e-05	0.000228332	0.00302539	0.00034195	0.0025254	0.00438431	0.0179818
	Unknown Bacteroidales	0.00684137	2.87052e-05	0.0209714	0.000201872	0.0191683	0.000669422	0.0111438	0.00203041	0.20498	0.374619	0.0208808	0.0332393	0.0337069	0.0485312
	Unknown Bacteroidetes	0.00424267	0.000142642	0.0122305	0.000765745	0.0138914	0.00100231	0.0160605	0.00190058	0.0127566	0.0450733	0.118257	0.130838	0.28956	0.307288
	Unknown Candidatus Saccharibacteria	0.00268937	5.56452e-05	0	0	0	0	0	0	0.00931345	0.0352581	N/A	N/A	N/A	N/A
	Unknown Clostridia	0.00488237	0.00498148	0.00385346	0.000981401	0.00374324	0.000783625	0.00725795	0.00100325	0.576497	0.73027	0.0754742	0.0912711	0.0597725	0.0758091
	Unknown Clostridiaceae	0	0	0	0	0.00101606	0.000134435	0	0	N/A	N/A	N/A	N/A	0.0850959	0.100568
	Unknown Clostridiales	0.0749125	0.0290193	0.0494434	0.000152329	0.0746181	0.00511752	0.0764446	0.000602328	0.952559	0.989914	0.000264622	0.0025254	0.665914	0.678972
	Unknown Clostridiales Family XIII. Incertae Sedis	0	0	0.00109551	8.56808e-05	0	0	0	0	N/A	N/A	0.166717	0.173386	N/A	N/A
	Unknown Ectothiorhodospiraceae	0	0	0	0	0.00106753	0.00022667	0	0	N/A	N/A	N/A	N/A	0.0223312	0.0400585
	Unknown Erysipelotrichaceae	0	0	0.0013135	0.000116086	0.00251988	0.000227189	0.0012321	7.62145e-05	0.00193439	0.0128153	0.494311	0.494311	0.0168763	0.0325026
	Unknown Firmicutes	0.00873121	0.00133464	0.00734021	0.000485578	0.0113543	0.00110795	0.00863243	5.76566e-05	0.92626	0.989914	0.0647229	0.0841398	0.0739712	0.0894535
	Unknown Gammaproteobacteria	0	0	0	0	0	0	0.00115822	2.93366e-06	0.086084	0.190102	0.00111193	0.00453948	0.000227202	0.00393816
	Unknown Lachnospiraceae	0.0980254	0.0510624	0.0604573	0.000997599	0.127116	0.0081909	0.104341	0.000531549	0.889767	0.989914	0.000331587	0.0025254	0.0592296	0.0758091
	Unknown Muribaculaceae	0.14633	0.000999813	0.085895	0.000294147	0.0679818	0.00244028	0.127465	0.00143191	0.00425776	0.0225661	0.000617708	0.00356898	0.00112933	0.00838929
	Unknown Mycoplasmataceae	0	0	0	0	0	0	0.00120981	4.26778e-05	0.311466	0.515866	0.0478983	0.0673166	0.0163233	0.0325026
	Unknown Oscillospiraceae	0.0301089	0.01501	0.00900062	0.000144313	0.0106915	0.00151196	0.0299706	0.002576	0.990916	0.990916	0.00748395	0.0155666	0.0117901	0.0279027
	Unknown Proteobacteria	0	0	0.00107542	1.29113e-05	0.00143324	6.34545e-05	0.00140245	0.000136142	0.567181	0.73027	0.0774163	0.0914919	0.799153	0.799153
	Unknown Rhizobiales	0	0	0	0	0	0	0.00523691	0.000142051	0.000376993	0.00399612	0.0120979	0.0224675	0.0121551	0.0279027
	Unknown Sphingobacteriaceae	0	0	0.0026912	1.9407e-05	0.00290653	0.000280745	0.00340312	0.000151004	0.0204374	0.0634954	0.0221115	0.0338175	0.158472	0.175331
SPECIES	Akkermansia muciniphila	0	0	0.00474216	0.000142352	0.0273797	0.000948436	0.00253027	0.000159784	0.00286894	0.0239078	0.00464757	0.0106023	0.000748207	0.00769853
	Alistipes finegoldii	0	0	0	0	0.00178837	3.69634e-05	0	0	N/A	N/A	N/A	N/A	0.00930353	0.0229118
	Alistipes sp. 5CPEGH6	0	0	0	0	0.00123693	0.000797378	0	0	N/A	N/A	N/A	N/A	0.272278	0.284293
	Alistipes sp. dk3624	0	0	0.00540908	0.000653087	0.0061559	8.12012e-05	0	0	N/A	N/A	0.0545197	0.0698235	0.00595327	0.0188878
	Anaerostipes hadrus	0.0454981	0.000832762	0.0542259	0.00190439	0.0408794	0.00233001	0.0472533	0.00555218	0.701613	0.785388	0.234983	0.248605	0.273071	0.284293
	Anaerostipes rhamnosivorans	0.00387664	0.00226691	0.00427658	0.000736868	0.00365763	0.000970418	0.00550372	0.000741222	0.436442	0.663368	0.238705	0.248935	0.165951	0.180175
	Anaerotignum propionicum	0.00284259	0.000104658	0.00302297	1.73458e-05	0.0035873	1.87674e-05	0.00276891	0.000128077	0.593085	0.695022	0.108707	0.120237	0.012279	0.0253503
	Asticcacaulis excentricus	0.00172641	4.21716e-05	0	0	0.00111996	0.000300813	0.0022409	0.000167389	0.0519382	0.162307	0.00641857	0.013781	0.0440638	0.0587517
	Bacteroides caecimuris	0	0	0.124143	0.00266277	0.089259	0.00637009	0	0	N/A	N/A	0.00965897	0.0181458	0.0321188	0.045788
	Bacteroides ovatus	0	0	0.014631	0.000344942	0.0115323	0.000679257	0.00408966	0.000479138	0.00694145	0.0410813	0.00156471	0.00567292	0.00617916	0.0188878
	Barnesiella viscericola	0	0	0	0	0	0	0.0017529	0.000201163	0.0068831	0.0410813	0.0207845	0.0324319	0.023881	0.0378116
	Blautia sp. SC05B48	0	0	0	0	0	0	0.00123742	0.000259492	0.530982	0.674977	0.0305479	0.0428846	0.055278	0.0724332
	Butyrivibrio fibrisolvens	0.00409683	0.00206827	0.00580986	2.23837e-05	0.00481871	0.000205025	0.00243088	4.91382e-05	0.458578	0.663368	0.000127656	0.00258512	0.00387529	0.0170621
	Butyrivibrio hungatei	0.0029281	0.00385267	0	0	0	0	0	0	0.51399	0.674977	N/A	N/A	N/A	N/A
	Caldilinea aerophila	0	0	0	0	0	0	0.00136484	0.000257696	0.37512	0.625199	0.0792305	0.0903723	0.14454	0.163956
	Candidatus Saccharibacteria bacterium YM S32 TM7 50 20	0.00236241	0.000340216	0	0	0	0	0	0	0.0646055	0.186362	N/A	N/A	N/A	N/A
	Candidatus Sulcia muelleri	0	0	0.00191693	0.00013866	0.00219779	0.000211563	0.0112663	0.000180273	0.000132947	0.00428122	0.000295741	0.00258512	0.000469388	0.00594558
	Clostridiales bacterium CCNA10	0.00554309	0.000787231	0.00206904	0.000300527	0.00338531	0.000471841	0.00698329	0.000284066	0.135385	0.282053	0.00352191	0.00918211	0.0115136	0.0253503
	Clostridium cellulovorans	0.00170883	0.000176896	0	0	0	0	0	0	0.0141257	0.0588572	N/A	N/A	N/A	N/A
	Clostridium hylemonae	0.00263152	0.00310061	0	0	0	0	0	0	0.522611	0.674977	N/A	N/A	N/A	N/A
	Clostridium scindens	0.00402843	0.00135061	0.00229144	0.000269013	0.00290735	0.000320739	0.00241372	0.000268443	0.239114	0.437404	0.693716	0.703351	0.23704	0.253733
	Clostridium sphenoides	0	0	0.00101649	0.000240039	0	0	0	0	N/A	N/A	0.10533	0.118294	N/A	N/A
	Desulfallas gibsoniae	0	0	0.00297089	3.24066e-05	0.00322018	0.000325458	0.00496364	0.000319293	0.0303748	0.10355	0.0127217	0.0211064	0.0325336	0.045788
	Ectothiorhodospiraceae bacterium BW-2	0	0	0	0	0.00106753	0.00022667	0	0	N/A	N/A	N/A	N/A	0.0223312	0.0372754
	endosymbiont 'TC1' of Trimyema compressum	0	0	0	0	0	0	0	0	N/A	N/A	N/A	N/A	N/A	N/A
	Ethanoligenens harbinense	0.00573614	0.000971537	0.00249899	0.000396216	0.00217023	4.12527e-05	0.00536605	6.88157e-05	0.644798	0.743997	0.00969431	0.0181458	0.000315001	0.00478801
	Eubacterium cellulosolvens	0.00890985	0.0017251	0	0	0.00216061	3.45372e-06	0.0017264	4.85068e-05	0.106854	0.235708	0.00208424	0.00633957	0.0062131	0.0188878
	Eubacterium eligens	0.0041678	0.0009138	0.00666884	0.000128365	0.00897598	3.93516e-05	0.0125963	0.000215196	0.00614598	0.0410813	0.000892313	0.00407118	0.00182069	0.0106907
	Faecalitalea cylindroides	0	0	0.005037	6.15977e-05	0.00883147	0.00086581	0	0	N/A	N/A	0.000201194	0.00258512	0.00568887	0.0188878
	Fastidiosipila sanguinis	0.00112496	0.000526499	0	0	0	0	0	0	0.383929	0.625971	N/A	N/A	N/A	N/A
	Flammeovirga pectinis	0	0	0	0	0	0	0.00177026	0.000381727	0.0230082	0.0862809	0.139498	0.149755	0.0317459	0.045788
	Flavonifractor plautii	0.014368	0.0030224	0.00513519	7.79685e-05	0.00473972	0.000451009	0.00783304	0.000192928	0.0926967	0.217258	0.00296138	0.00831465	0.0123416	0.0253503
	Flintibacter sp. KGMB00164	0.00242828	0.00268013	0	0	0	0	0	0	0.504498	0.674977	N/A	N/A	N/A	N/A
	Heliorestis convoluta	0.00117853	0.00133405	0	0	0	0	0	0	0.654843	0.74414	N/A	N/A	N/A	N/A
	Herbinix luporum	0.0442712	0.00907676	0.0298385	0.00229243	0.0327802	0.00135425	0.0221182	0.00219477	0.0785243	0.217258	0.0750996	0.0888648	0.0280293	0.0417691
	Intestinibaculum porci	0	0	0	0	0	0	0.00117671	4.12667e-06	0.000191377	0.00428122	0.000950439	0.0040813	0.163154	0.179706
	Lachnoclostridium phocaeense	0.0324479	0.0405882	0.00229129	0.000279882	0	0	0.00233101	0.000329243	0.484662	0.668538	0.908459	0.908459	0.0274166	0.0416733
	Lachnoclostridium phytofermentans	0.00534183	0.00209925	0	0	0	0	0.00182121	0.000172942	0.141862	0.287557	0.00697403	0.0144949	0.0173953	0.0312282
	Lachnospiraceae bacterium Choco86	0.0275573	0.00358327	0.00559712	0.000530944	0.00729193	0.0010005	0.0373671	0.00564177	0.173578	0.342456	0.0155375	0.0252053	0.0176686	0.0312282
	Lachnospiraceae bacterium GAM79	0.0117115	0.0116449	0.00831743	0.000220065	0.0083243	0.00146641	0	0	0.395981	0.631884	0.012127	0.0205877	0.0810672	0.0993728
	Lachnospiraceae bacterium KM106-2	0.00648017	0.0031769	0.00283588	0.000207369	0	0	0.00144888	2.10693e-06	0.267335	0.477384	0.0670286	0.0829337	4.04363e-05	0.00153658
	Muribaculaceae bacterium DSM 108610	0.136333	0.00688908	0.0799843	0.000791738	0.0606787	0.00174592	0.101043	0.000204615	0.0870862	0.217258	0.00075313	0.00394608	0.000946972	0.00769853
	Muribaculum intestinale	0	0	0	0	0	0	0.00141715	1.96357e-05	0.58111	0.691798	0.000153754	0.00258512	0.0136076	0.0272152
	Muribaculum sp. H5	0.0722975	0.00715452	0.00549288	0.000161771	0.00404188	0.000640849	0.0155364	0.000385544	0.00787293	0.0421764	0.00086539	0.00407118	0.00211	0.0106907
	Muribaculum sp. TLL-A4	0.0336596	0.0227872	0.0765517	0.000174992	0.0574495	0.006196	0.02834	0.00127141	0.773001	0.852575	0.000354126	0.00258512	0.0228024	0.0372754
	Odoribacter splanchnicus	0	0	0.0340928	0.000946519	0.0256989	0.00360582	0.112608	0.000653769	2.41106e-05	0.0018083	0.000107312	0.00258512	0.000887792	0.00769853
	Oscillibacter valericigenes	0.0579917	0.0172373	0.0152561	0.00258172	0.0132552	0.00167723	0.0330874	0.000861893	0.178077	0.342456	0.0114499	0.0205877	0.00449004	0.0170621
	Petrocella atlantisensis	0.00119434	0.001556	0	0	0	0	0	0	0.490261	0.668538	N/A	N/A	N/A	N/A
	Roseburia hominis	0.00165665	0.000413566	0	0	0	0	0.00349355	0.000264041	0.0338737	0.110458	0.00400423	0.0100301	0.00608654	0.0188878
	Roseburia intestinalis	0.0284449	0.00951374	0.00548054	0.000321381	0.00412734	0.000685292	0.0234423	0.00276841	0.549304	0.68663	0.0118246	0.0205877	0.010726	0.0253503
	Ruminococcaceae bacterium CPB6	0	0	0	0	0	0	0.00127759	1.54672e-05	0.463607	0.663368	0.000435904	0.00289281	0.00747715	0.0210468
	Ruminococcus albus	0.00435915	0.00164092	0.00120843	2.07465e-05	0.00156941	0.000100497	0.00332732	0.000124683	0.46878	0.663368	0.00177448	0.00567292	0.00412374	0.0170621
	Ruminococcus champanellensis	0.00412565	0.000711953	0	0	0	0	0.00250989	7.62703e-05	0.0857502	0.217258	0.000750516	0.00394608	0.00190105	0.0106907
	Ruminococcus sp. JE7A12	0	0	0	0	0	0	0.00109897	0.000168768	0.0900189	0.217258	0.022174	0.0330347	0.0230519	0.0372754
	Salimicrobium jeotgali	0	0	0	0	0.00101437	0.000132044	0.00231748	0.000104995	0.0010323	0.0110604	0.00282325	0.0082439	0.00827593	0.0224486
	Stenotrophomonas maltophilia	0.00133322	0.000864331	0.00224934	1.22874e-05	0.00104514	0.000117234	0.00296525	0.000236951	0.123469	0.264576	0.0507745	0.0661881	0.00934562	0.0229118
	Turicibacter sp. H121	0	0	0	0	0.00166108	1.6297e-05	0.00218162	4.61103e-05	0.000228332	0.00428122	0.00034195	0.00258512	0.00438431	0.0170621
	Unknown Akkermansia	0	0	0	0	0.00154627	2.94225e-05	0	0	N/A	N/A	N/A	N/A	0.000230867	0.00438647
	Unknown Alistipes	0	0	0.00505561	0.000386065	0.00949522	0.000383924	0	0	N/A	N/A	0.0342821	0.0463444	0.0180812	0.0312312
	Unknown Bacteroidales	0.00684137	2.87052e-05	0.0209714	0.000201872	0.0191683	0.000669422	0.0111438	0.00203041	0.20498	0.384338	0.0208808	0.0324319	0.0337069	0.0465768
	Unknown Bacteroides	0	0	0.188711	0.000522781	0.13441	0.0119771	0	0	N/A	N/A	3.98267e-06	0.000290735	0.0402466	0.0546205
	Unknown Bacteroidetes	0.00424267	0.000142642	0.0122305	0.000765745	0.0138914	0.00100231	0.0160605	0.00190058	0.0127566	0.0562791	0.118257	0.128847	0.28956	0.297385
	Unknown Blautia	0.0077452	0.00988894	0	0	0	0	0	0	0.468471	0.663368	N/A	N/A	N/A	N/A
	Unknown Butyrivibrio	0.00514588	0.00542932	0.00860132	0.000787858	0.00928807	6.45537e-05	0	0	0.412795	0.644992	0.00425936	0.0100301	3.58912e-05	0.00153658
	Unknown Cellulosilyticum	0.00220468	0.000390279	0	0	0	0	0.00657067	0.000349399	0.00712076	0.0410813	0.00150843	0.00567292	0.00159418	0.0106907
	Unknown Citrobacter	0	0	0	0	0	0	0.00312696	0.000172342	0.0247695	0.0884626	0.00558711	0.0123594	0.0247979	0.038462
	Unknown Clostridia	0.00488237	0.00498148	0.00385346	0.000981401	0.00374324	0.000783625	0.00725795	0.00100325	0.576497	0.691798	0.0754742	0.0888648	0.0597725	0.0757119
	Unknown Clostridiaceae	0	0	0	0	0.00101606	0.000134435	0	0	N/A	N/A	N/A	N/A	0.0850959	0.102655
	Unknown Clostridiales	0.0749125	0.0290193	0.0494434	0.000152329	0.0746181	0.00511752	0.0764446	0.000602328	0.952559	0.965431	0.000264622	0.00258512	0.665914	0.674793
	Unknown Clostridium	0.0274672	0.0169497	0.00642107	0.000277475	0.00635466	0.000647014	0.0291391	0.00133151	0.902134	0.950261	0.00178736	0.00567292	0.00210412	0.0106907
	Unknown Dehalococcoides	0	0	0	0	0	0	0.00155913	0.000201714	0.00889188	0.0433358	0.0245534	0.035848	0.014088	0.0274536
	Unknown Enterococcus	0	0	0.00120216	1.47436e-05	0	0	0	0	N/A	N/A	0.00418369	0.0100301	N/A	N/A
	Unknown Erysipelotrichaceae	0	0	0.0013135	0.000116086	0.00251988	0.000227189	0.0012321	7.62145e-05	0.00193439	0.0181349	0.494311	0.508235	0.0168763	0.0312282
	Unknown Firmicutes	0.00873121	0.00133464	0.00734021	0.000485578	0.0113543	0.00110795	0.00863243	5.76566e-05	0.92626	0.951637	0.0647229	0.0814616	0.0739712	0.0921608
	Unknown Gammaproteobacteria	0	0	0	0	0	0	0.00115822	2.93366e-06	0.086084	0.217258	0.00111193	0.00450951	0.000227202	0.00438647
	Unknown Lachnoclostridium	0.01011	0.00256666	0.00249473	0.000290401	0.00378675	0.00119606	0.00742353	0.00115898	0.309763	0.530908	0.0281475	0.0402896	0.090804	0.106171
	Unknown Lachnospiraceae	0.0980254	0.0510624	0.0604573	0.000997599	0.127116	0.0081909	0.104341	0.000531549	0.889767	0.950261	0.000331587	0.00258512	0.0592296	0.0757119
	Unknown Lachnospiraceae bacterium	0.001391	0.000281817	0	0	0	0	0	0	0.0999195	0.22709	N/A	N/A	N/A	N/A
	Unknown Lactobacillus	0	0	0.00135116	6.28294e-05	0.00108299	5.41298e-05	0	0	N/A	N/A	0.0311826	0.0429497	0.0881715	0.104704
	Unknown Muribaculaceae	0.00999753	0.00588927	0.00591067	0.00049759	0.00730315	0.000694357	0.0264226	0.00163653	0.0627923	0.186362	0.00345896	0.00918211	0.00429486	0.0170621
	Unknown Muribaculum	0.0260581	0.0098195	0.0124426	0.00147462	0.0119427	0.00151237	0.0251923	0.000417869	0.91225	0.950261	0.00714818	0.0144949	0.00693892	0.020283
	Unknown Mycoplasmataceae	0	0	0	0	0	0	0.00120981	4.26778e-05	0.311466	0.530908	0.0478983	0.0635742	0.0163233	0.0310142
	Unknown Oscillospiraceae	0.0301089	0.01501	0.00900062	0.000144313	0.0106915	0.00151196	0.0299706	0.002576	0.990916	0.990916	0.00748395	0.0147656	0.0117901	0.0253503
	Unknown Parabacteroides	0.0130991	0.0138516	0.0099732	0.000598402	0.00969796	0.00222585	0.0144837	0.00172383	0.901292	0.950261	0.0729855	0.088799	0.138078	0.158999
	Unknown Proteobacteria	0	0	0.00107542	1.29113e-05	0.00143324	6.34545e-05	0.00140245	0.000136142	0.567181	0.691798	0.0774163	0.0897045	0.799153	0.799153
	Unknown Rhizobiales	0	0	0	0	0	0	0.00523691	0.000142051	0.000376993	0.00565489	0.0120979	0.0205877	0.0121551	0.0253503
	Unknown Ruminococcus	0.00324286	6.22392e-05	0	0	0.0013149	0.000343222	0.00399313	8.17348e-05	0.00924498	0.0433358	0.00172515	0.00567292	0.00856591	0.0224486
	Unknown Sphingobacteriaceae	0	0	0.0026912	1.9407e-05	0.00290653	0.000280745	0.00340312	0.000151004	0.0204374	0.0806739	0.0221115	0.0330347	0.158472	0.177116
	Unknown Tannerella	0	0	0	0	0	0	0.00321512	0.000116039	0.000890003	0.0110604	0.000756783	0.00394608	0.00101296	0.00769853
